# Supplementary material for: The Effect of an Elevated Dietary Copper Level on the Vascular Contractility and Oxidative Stress in Middle-Aged Rats
Source: MDPI journal article supplement (doi:10.3390/nu16081172), 2024-04-15
Supplement: s1 [file s1]

**Table S1.** The ELISA kits used for the determination of antioxidant status in the presented study.

|    | <b>Antigen</b>       | <b>ELISA kit catalogue number</b> | <b>Manufacturer, country</b> | <b>Assay range (pg/ml)</b>                                       |
|----|----------------------|-----------------------------------|------------------------------|------------------------------------------------------------------|
| 1. | Rat PTGS1 ELISA Kit  | orb566784                         | Biorbyt, UK                  | 0.156–10 ng/mL<br>Intra–Assay: CV<8%<br>Inter–Assay: CV<10%      |
| 2. | Rat PTGS2 ELISA Kit  | orb1199748                        | Biorbyt, UK                  | 78.1–5000 pg/mL<br>Intra–Assay: CV<10%<br>Inter–Assay: CV<12%    |
| 3. | Rat HO–1 ELISA Kit   | orb567452                         | Biorbyt, UK                  | 0.156–10 ng/mL<br>Intra–Assay: CV<8%<br>Inter–Assay: CV<10%      |
| 4. | Rat NOS3 ELISA Kit   | orb566738                         | Biorbyt, UK                  | 15.625–1000 pg/mL<br>Intra–Assay: CV<8%<br>Inter–Assay: CV<10%   |
| 5. | Rat GAPDH ELISA Kit  | orb567887                         | Biorbyt, UK                  | 0.156–11 ng/mL<br>Intra–Assay: CV<8%<br>Inter–Assay: CV<10%      |
| 6. | Rat ICAM–1 ELISA Kit | RAB0221–1KT                       | Sigma–Aldrich, Germany       | 28.81–7000 pg/mL<br>inter–assay cv: <12%<br>intra–assay cv: <10% |

**Table S2.** Significant differences not detected.

|                             | 100% – Group A |        |                  | 200% – Group B |        |                  | t test            | p value | x-fold (B/A) |
|-----------------------------|----------------|--------|------------------|----------------|--------|------------------|-------------------|---------|--------------|
|                             | n              | Mean   | "Std. Deviation" | n              | Mean   | "Std. Deviation" |                   |         |              |
| Body weight begin (g)       | 12             | 492.4  | 32.84            | 12             | 497.6  | 33.75            | Unpaired t test   | 0.7080  | 1.0          |
| Body weight final (g)       | 11             | 530.3  | 39.80            | 12             | 536.5  | 34.54            | Mann Whitney test | 0.7859  | 1.0          |
| Body weight gain (g)        | 11             | 37.16  | 27.51            | 12             | 38.89  | 42.29            | Unpaired t test   | 0.9093  | 1.0          |
| Fat (g)                     | 11             | 92.52  | 23.31            | 11             | 84.19  | 22.83            | Unpaired t test   | 0.4072  | 0.9          |
| Fat (%)                     | 11             | 17.25  | 3.224            | 11             | 15.85  | 4.231            | Unpaired t test   | 0.3929  | 0.9          |
| Lean (g)                    | 11             | 323.1  | 16.21            | 11             | 329.5  | 25.44            | Unpaired t test   | 0.4946  | 1.0          |
| Lean (%)                    | 11             | 61.06  | 2.273            | 11             | 61.96  | 3.158            | Unpaired t test   | 0.4490  | 1.0          |
| F/L ratio                   | 11             | 0.285  | 0.063            | 11             | 0.258  | 0.076            | Mann Whitney test | 0.6063  | 0.9          |
| Heart (g)                   | 11             | 1.110  | 0.074            | 12             | 1.140  | 0.120            | Unpaired t test   | 0.4810  | 1.0          |
| Liver small + large part(g) | 11             | 22.92  | 3.302            | 12             | 22.94  | 2.995            | Unpaired t test   | 0.9886  | 1.0          |
| Spleen (g)                  | 11             | 0.882  | 0.183            | 12             | 0.900  | 0.209            | Mann Whitney test | 0.9879  | 1.0          |
| Kidney (g)                  | 11             | 2.476  | 0.262            | 12             | 2.576  | 0.531            | Mann Whitney test | 0.9279  | 1.0          |
| Brain (g)                   | 11             | 2.028  | 0.086            | 12             | 2.042  | 0.090            | Unpaired t test   | 0.7151  | 1.0          |
| Fe (mg/L)                   | 10             | 2.317  | 0.449            | 11             | 2.349  | 0.391            | Unpaired t test   | 0.8643  | 1.0          |
| Se (ug/L)                   | 10             | 361.2  | 42.17            | 11             | 362.2  | 66.01            | Unpaired t test   | 0.9689  | 1.0          |
| Cu/Se (ratio)               | 10             | 2.813  | 0.5421           | 12             | 3.702  | 1.620            | Mann Whitney test | 0.1335  | 1.3          |
| Se/Zn (ratio)               | 10             | 0.377  | 0.048            | 11             | 0.356  | 0.067            | Unpaired t test   | 0.4348  | 0.9          |
| Zn (µg/g of liver tissue)   | 9              | 23.14  | 1.151            | 10             | 24.30  | 1.328            | Unpaired t test   | 0.0589  | 1.1          |
| Fe (µg/g of liver tissue)   | 9              | 107.1  | 13.71            | 10             | 114.3  | 25.01            | Unpaired t test   | 0.4581  | 1.1          |
| Se (µg/g of liver tissue)   | 9              | 0.7519 | 0.064            | 10             | 0.7694 | 0.082            | Unpaired t test   | 0.6132  | 1.0          |
| HO-1 (ng/mL)                | 10             | 1.606  | 0.539            | 11             | 1.979  | 0.962            | Mann Whitney test | 0.3867  | 1.2          |
| NOS3 (pg/mL)                | 10             | 92.18  | 20.85            | 12             | 86.32  | 27.67            | Unpaired t test   | 0.5749  | 0.9          |
| iCAM (pg/mL)                | 10             | 70.99  | 16.80            | 10             | 97.60  | 23.50            | Unpaired t test   | 0.9638  | 1.4          |

n varies: rat died and/or a simple lab mistake occurred

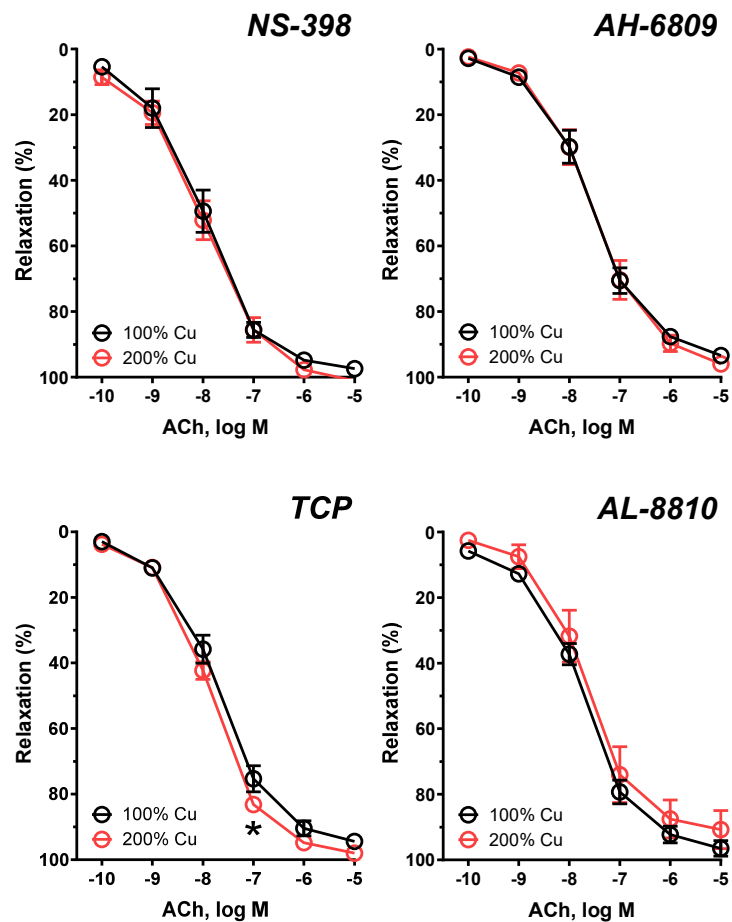

**Figure S1.** The cumulative concentration–response curves to acetylcholine (ACh, 0.1 nM–10  $\mu$ M) in the isolated thoracic arteries dissected from rats fed with experimental diets. Aortic rings were incubated with NS-398, AH-6809, TCP and AL-8810. Values are means  $\pm$  SEM,  $n = 12$ , \* vs. control diet (100% copper),  $p \leq 0.05$  (two-way ANOVA with Šidák's multiple comparisons test).

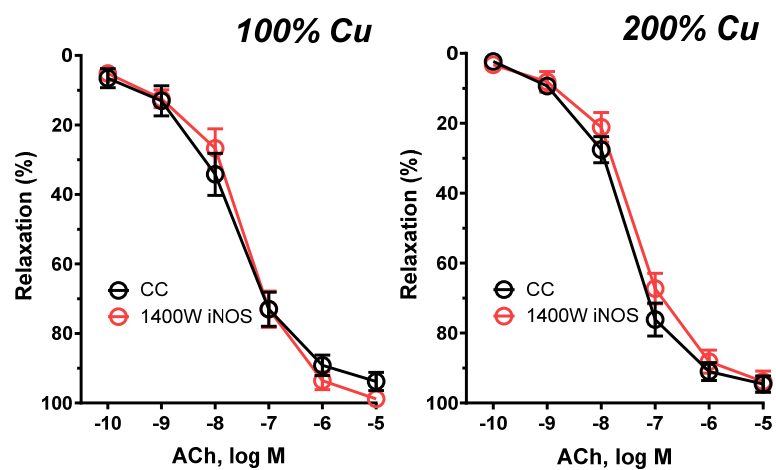

**Figure S2.** The cumulative concentration–response curves to acetylcholine (ACh, 0.1 nM–10  $\mu$ M) in the isolated thoracic arteries dissected from rats fed with experimental diets. Aortic rings were incubated with 1400W. Values are means  $\pm$  SEM,  $n = 12$  ( $n$  varies), \* vs. control conditions,  $p \leq 0.05$  (two–way ANOVA with Šídák’s multiple comparisons test).
